# Supplementary material for: Protein evolution in yeast transcription factor subnetworks
Source: PubMed Central journal article supplement — Nucleic Acids Res. 2010 May 13;38(18):5959–69. doi: 10.1093/nar/gkq353 (PMC2952844; doi:10.1093/nar/gkq353), 2010-05-13
Supplement: supp_gkq353_Supplementary-Data.pdf [file supp_gkq353_Supplementary-Data.pdf]

## Supplementary Material

**Supplementary Figure 1:** Expression level distribution for generic proteins and TFs, as measured by Codon Adaption Index (CAI).

**Supplementary Figure 2:** Alternative binning of Figure 1a using the same bin intervals as Figure 1b.

**Supplementary Figure 3:** Alternative binning of Figure 3a using the same bin intervals as Figure 3b.

**Supplementary Table 1:** The list of 174 yeast transcription factors (TFs) by name, measures of evolutionary rate, and degrees in different networks.

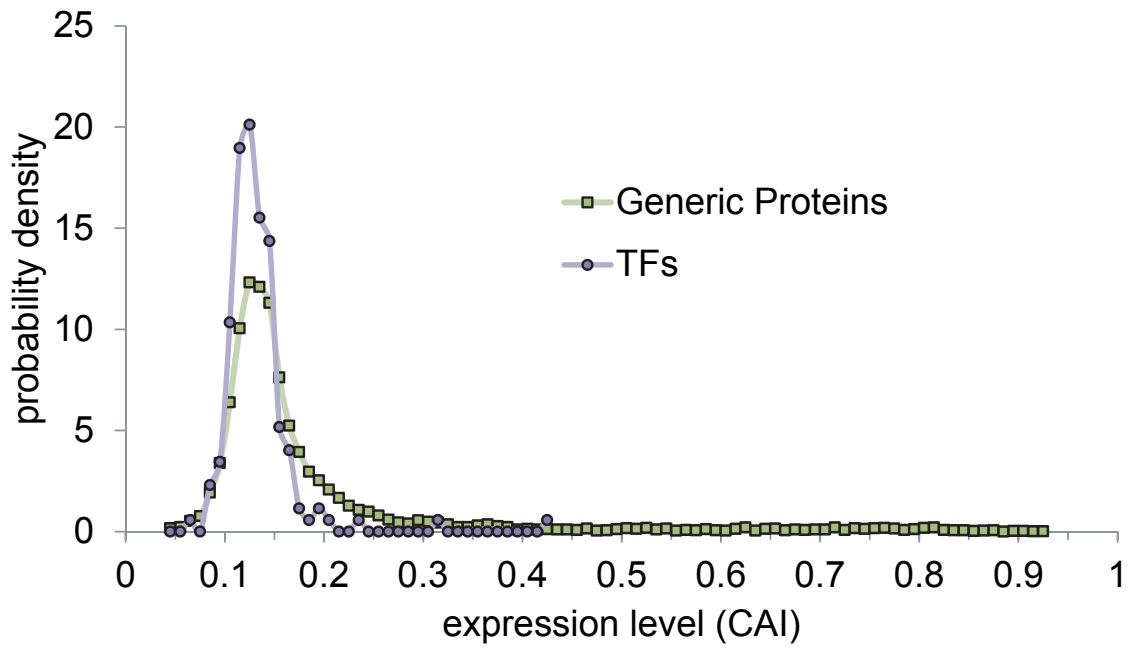

Supplementary Figure 1

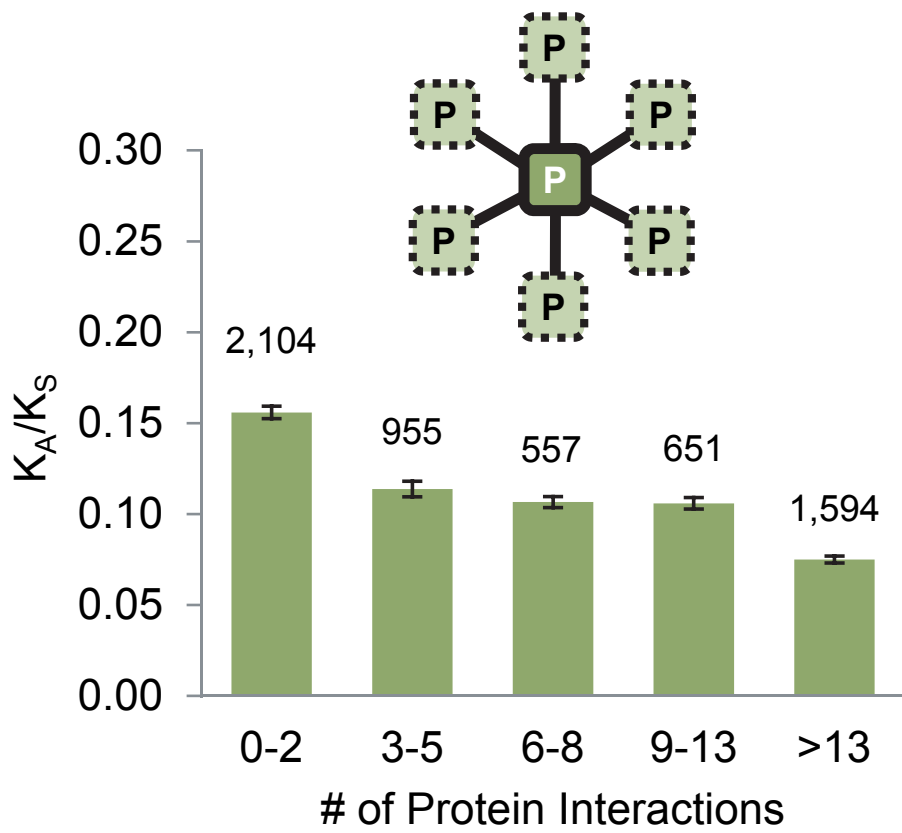

Supplementary Figure 2

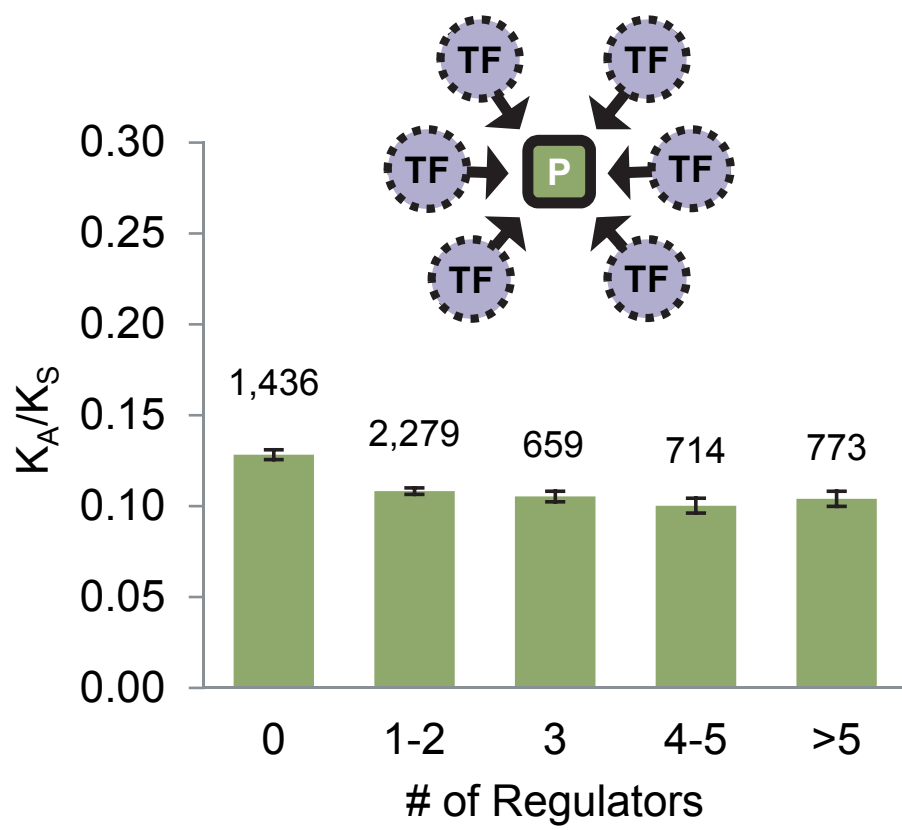

Supplementary Figure 3

**Supplementary Table 1:**

The list of 174 yeast transcription factors (TFs) by name, evolutionary rate, and degrees in different networks.

| ORF     | Gene name | Ka     | Ks     | Ka/Ks  | Degree in physical interactome | In-degree in transcriptional regulatory network | Degree in TF co-regulatory network | Number of regulated TFs | Number of regulated target genes |
|---------|-----------|--------|--------|--------|--------------------------------|-------------------------------------------------|------------------------------------|-------------------------|----------------------------------|
| YAL051W | OAF1      | 0.0279 | 0.4755 | 0.0587 | 13                             | 0                                               | 2                                  | 5                       | 60                               |
| YBL005W | PDR3      | 0.0473 | 0.3893 | 0.1215 | 5                              | 1                                               | 2                                  | 1                       | 20                               |
| YBL008W | HIR1      | 0.0437 | 0.3852 | 0.1134 | 12                             | 2                                               | 0                                  | 0                       | 3                                |
| YBL021C | HAP3      | 0.0033 | 0.3006 | 0.011  | 7                              | 0                                               | 24                                 | 3                       | 106                              |
| YBL103C | RTG3      | 0.0328 | 0.2738 | 0.1198 | 8                              | 2                                               | 39                                 | 2                       | 142                              |
| YBR049C | REB1      | 0.0173 | 0.3263 | 0.053  | 24                             | 3                                               | 1                                  | 6                       | 228                              |
| YBR066C | NRG2      | 0.0609 | 0.271  | 0.2247 | 3                              | 6 #                                             | #                                  | #                       |                                  |
| YBR083W | TEC1      | 0.054  | 0.2838 | 0.1903 | 12                             | 8                                               | 26                                 | 33                      | 508                              |
| YBR112C | CYC8      | 0.0478 | 0.3598 | 0.1329 | 25                             | 5 #                                             | #                                  | #                       |                                  |
| YBR182C | SMP1      | 0.1029 | 0.3938 | 0.2613 | 2                              | 3                                               | 27                                 | 5                       | 100                              |
| YBR215W | HPC2      | 0.0912 | 0.3392 | 0.2689 | 7                              | 0 #                                             | #                                  | #                       |                                  |
| YBR240C | THI2      | 0.0324 | 0.293  | 0.1106 | 1                              | 0                                               | 12                                 | 0                       | 56                               |
| YBR297W | MAL33     | 0.0724 | 0.2594 | 0.2791 | 0                              | 1                                               | 26                                 | 6                       | 129                              |
| YCL055W | KAR4      | 0.0055 | 0.4211 | 0.0131 | 3                              | 5 #                                             | #                                  | #                       |                                  |
| YCL066W | HMLALPHA1 | #      | #      | #      | 2                              | 7 #                                             | #                                  | #                       |                                  |
| YCL067C | HMLALPHA2 | 0      | 0.0178 | 0      | 5                              | 7 #                                             | #                                  | #                       |                                  |
| YCR065W | HCM1      | 0.0322 | 0.3204 | 0.1005 | 6                              | 8                                               | 4                                  | 5                       | 243                              |
| YCR097W | HMRA1     | #      | #      | #      | 2                              | 0 #                                             | #                                  | #                       |                                  |
| YCR106W | RDS1      | 0.091  | 0.4128 | 0.2204 | 1                              | 5                                               | 18                                 | 1                       | 46                               |
| YDL020C | RPN4      | 0.0546 | 0.3542 | 0.1542 | 8                              | 5                                               | 12                                 | 5                       | 197                              |
| YDL056W | MBP1      | 0.0344 | 0.4037 | 0.0852 | 9                              | 2                                               | 20                                 | 7                       | 238                              |
| YDL106C | PHO2      | 0.0272 | 0.3804 | 0.0715 | 25                             | 2                                               | 7                                  | 3                       | 80                               |

|         |       |        |        |        |    |     |    |    |     |
|---------|-------|--------|--------|--------|----|-----|----|----|-----|
| YDL170W | UGA3  | 0.0212 | 0.2651 | 0.08   | 0  | 7   | 46 | 1  | 74  |
| YDR034C | LYS14 | 0.0281 | 0.3941 | 0.0713 | 3  | 6 # | #  | #  |     |
| YDR043C | NRG1  | #      | #      | #      | 5  | 6   | 47 | 16 | 210 |
| YDR081C | PDC2  | 0.0411 | 0.4215 | 0.0975 | 2  | 0   | 1  | 1  | 7   |
| YDR096W | GIS1  | 0.0559 | 0.3908 | 0.143  | 19 | 1 # | #  | #  |     |
| YDR123C | INO2  | 0.069  | 0.2623 | 0.2631 | 7  | 2   | 5  | 3  | 50  |
| YDR146C | SWI5  | 0.0686 | 0.4408 | 0.1556 | 28 | 10  | 22 | 4  | 138 |
| YDR172W | SUP35 | 0.0174 | 0.3384 | 0.0514 | 40 | 0 # | #  | #  |     |
| YDR207C | UME6  | 0.0515 | 0.2551 | 0.2019 | 26 | 7   | 0  | 9  | 167 |
| YDR213W | UPC2  | 0.0255 | 0.3615 | 0.0705 | 3  | 2   | 7  | 0  | 36  |
| YDR216W | ADR1  | 0.0506 | 0.4435 | 0.1141 | 22 | 3   | 6  | 2  | 149 |
| YDR253C | MET32 | 0.0398 | 0.2584 | 0.154  | 1  | 4   | 11 | 4  | 75  |
| YDR259C | YAP6  | 0.0618 | 0.4313 | 0.1433 | 14 | 15  | 64 | 10 | 212 |
| YDR277C | MTH1  | 0.0121 | 0.3284 | 0.0368 | 7  | 3   | 0  | 0  | 2   |
| YDR310C | SUM1  | 0.0578 | 0.3626 | 0.1594 | 7  | 3   | 0  | 2  | 77  |
| YDR421W | ARO80 | 0.0522 | 0.4282 | 0.1219 | 1  | 1   | 0  | 3  | 56  |
| YDR423C | CAD1  | 0.1956 | 0.3742 | 0.5227 | 3  | 2   | 21 | 3  | 111 |
| YDR451C | YHP1  | 0.0584 | 0.39   | 0.1497 | 2  | 14  | 7  | 2  | 145 |
| YDR463W | STP1  | 0.048  | 0.4077 | 0.1177 | 7  | 3   | 34 | 1  | 92  |
| YEL009C | GCN4  | 0.0336 | 0.2983 | 0.1126 | 35 | 9   | 9  | 13 | 245 |
| YER028C | MIG3  | 0.1628 | 0.2912 | 0.5591 | 3  | 6   | 28 | 0  | 9   |
| YER040W | GLN3  | 0.0237 | 0.2732 | 0.0867 | 10 | 6   | 45 | 6  | 117 |
| YER045C | ACA1  | 0.1401 | 0.3595 | 0.3897 | 1  | 12  | 20 | 0  | 2   |
| YER088C | DOT6  | 0.0533 | 0.2405 | 0.2216 | 4  | 2   | 0  | 8  | 235 |
| YER109C | FLO8  | 0.0676 | 0.3502 | 0.193  | 4  | 3   | 31 | 23 | 230 |
| YER111C | SWI4  | 0.0393 | 0.3765 | 0.1044 | 10 | 8   | 27 | 18 | 305 |
| YER161C | SPT2  | 0.0234 | 0.4091 | 0.0572 | 35 | 1 # | #  | #  |     |
| YER169W | RPH1  | 0.0276 | 0.3978 | 0.0694 | 3  | 2   | 19 | 0  | 54  |
| YFL021W | GAT1  | 0.0352 | 0.3004 | 0.1172 | 3  | 12  | 34 | 5  | 118 |

|         |        |        |        |        |     |     |    |    |     |
|---------|--------|--------|--------|--------|-----|-----|----|----|-----|
| YFL031W | HAC1   | 0.0138 | 0.1499 | 0.0921 | 7   | 1   | 1  | 0  | 15  |
| YFR034C | PHO4   | 0.0334 | 0.3832 | 0.0872 | 147 | 2   | 2  | 5  | 107 |
| YGL013C | PDR1   | 0.0245 | 0.4108 | 0.0596 | 10  | 8   | 29 | 1  | 136 |
| YGL035C | MIG1   | 0.038  | 0.3565 | 0.1066 | 24  | 0   | 8  | 1  | 60  |
| YGL071W | AFT1   | 0.0579 | 0.3796 | 0.1525 | 8   | 5   | 11 | 7  | 352 |
| YGL073W | HSF1   | 0.0477 | 0.3542 | 0.1347 | 8   | 1   | 8  | 6  | 196 |
| YGL096W | TOS8   | 0.0661 | 0.465  | 0.1422 | 4   | 9   | 17 | 8  | 239 |
| YGL162W | SUT1   | 0.0618 | 0.3872 | 0.1596 | 1   | 7 # | #  | #  |     |
| YGL166W | CUP2   | 0.1756 | 0.3166 | 0.5546 | 9   | 1 # | #  | #  |     |
| YGL181W | GTS1   | 0.0419 | 0.5444 | 0.077  | 14  | 5   | 1  | 2  | 23  |
| YGL192W | IME4   | 0.0535 | 0.3225 | 0.1659 | 4   | 3   | 31 | 0  | 34  |
| YGL209W | MIG2   | 0.0194 | 0.2582 | 0.0751 | 5   | 3   | 9  | 0  | 23  |
| YGL237C | HAP2   | 0.0523 | 0.2543 | 0.2057 | 37  | 4   | 25 | 6  | 129 |
| YGL254W | FZF1   | 0.1367 | 0.5377 | 0.2542 | 6   | 6   | 11 | 1  | 25  |
| YGR044C | RME1   | 0.1264 | 0.3165 | 0.3994 | 0   | 0   | 10 | 1  | 45  |
| YGR249W | MGA1   | 0.0375 | 0.3529 | 0.1063 | 13  | 19  | 39 | 15 | 189 |
| YGR288W | MAL13  | 0.0843 | 0.7441 | 0.1133 | 0   | 2   | 3  | 0  | 3   |
| YHL009C | YAP3   | 0.1186 | 0.4137 | 0.2867 | 9   | 1   | 2  | 2  | 34  |
| YHL020C | OPI1   | 0.0428 | 0.469  | 0.0913 | 9   | 2   | 2  | 0  | 3   |
| YHL027W | RIM101 | 0.0726 | 0.366  | 0.1984 | 5   | 6   | 36 | 5  | 141 |
| YHR006W | STP2   | 0.0647 | 0.3126 | 0.207  | 0   | 2   | 3  | 1  | 31  |
| YHR056C | RSC30  | 0.0695 | 0.2848 | 0.244  | 20  | 0 # | #  | #  |     |
| YHR084W | STE12  | 0.0298 | 0.4067 | 0.0733 | 27  | 5   | 21 | 38 | 591 |
| YHR124W | NDT80  | 0.0325 | 0.4005 | 0.0811 | 4   | 1   | 4  | 1  | 18  |
| YHR178W | STB5   | 0.0279 | 0.3346 | 0.0834 | 3   | 2   | 3  | 1  | 50  |
| YHR206W | SKN7   | 0.0157 | 0.3595 | 0.0437 | 9   | 2   | 37 | 14 | 254 |
| YIL036W | CST6   | 0.0685 | 0.5004 | 0.1369 | 10  | 4   | 8  | 0  | 26  |
| YIL101C | XBP1   | #      | #      | #      | 4   | 13  | 51 | 5  | 76  |
| YIL131C | FKH1   | 0.0245 | 0.3378 | 0.0725 | 26  | 1   | 5  | 6  | 161 |

|         |       |        |        |        |    |    |    |    |     |
|---------|-------|--------|--------|--------|----|----|----|----|-----|
| YIL154C | IMP2' | 0.0159 | 0.5359 | 0.0297 | 2  | 0  | #  | #  | #   |
| YIR013C | GAT4  | 0.0561 | 0.2511 | 0.2234 | 0  | 6  | #  | #  | #   |
| YIR017C | MET28 | 0.0105 | 0.3052 | 0.0344 | 5  | 4  | 7  | 2  | 44  |
| YIR018W | YAP5  | 0.0655 | 0.3355 | 0.1952 | 2  | 5  | 29 | 12 | 348 |
| YIR023W | DAL81 | 0.0292 | 0.3564 | 0.0819 | 5  | 2  | 22 | 4  | 161 |
| YIR033W | MGA2  | 0.0338 | 0.3022 | 0.1118 | 9  | 4  | #  | #  | #   |
| YJL056C | ZAP1  | 0.0692 | 0.3071 | 0.2253 | 2  | 1  | 15 | 3  | 30  |
| YJL089W | SIP4  | 0.0631 | 0.3228 | 0.1955 | 10 | 2  | 9  | 1  | 42  |
| YJL103C | GSM1  | 0.0603 | 0.4694 | 0.1285 | 3  | 1  | #  | #  | #   |
| YJL110C | GZF3  | 0.0806 | 0.4973 | 0.1621 | 13 | 2  | 35 | 2  | 56  |
| YJR060W | CBF1  | 0.0573 | 0.3583 | 0.1599 | 14 | 2  | 6  | 16 | 306 |
| YJR094C | IME1  | 0.0752 | 0.3243 | 0.2319 | 4  | 11 | 26 | 0  | 7   |
| YJR127C | RSF2  | 0.0476 | 0.3745 | 0.1271 | 1  | 11 | 17 | 1  | 9   |
| YJR147W | HMS2  | 0.0757 | 0.2736 | 0.2767 | 0  | 7  | 15 | 1  | 43  |
| YKL005C | BYE1  | 0.0774 | 0.3468 | 0.2232 | 2  | 3  | #  | #  | #   |
| YKL015W | PUT3  | 0.0308 | 0.3749 | 0.0822 | 6  | 10 | 20 | 3  | 123 |
| YKL020C | SPT23 | 0.0489 | 0.361  | 0.1355 | 9  | 3  | 28 | 1  | 28  |
| YKL032C | IXR1  | 0.008  | 0.3913 | 0.0204 | 1  | 5  | 25 | 1  | 58  |
| YKL038W | RGT1  | 0.0376 | 0.3506 | 0.1072 | 11 | 0  | 1  | 3  | 23  |
| YKL043W | PHD1  | 0.0466 | 0.3142 | 0.1483 | 3  | 12 | 29 | 29 | 450 |
| YKL062W | MSN4  | 0.0336 | 0.3205 | 0.1048 | 6  | 7  | 35 | 4  | 199 |
| YKL109W | HAP4  | 0.0507 | 0.3232 | 0.1569 | 9  | 12 | 30 | 4  | 146 |
| YKL112W | ABF1  | 0.0404 | 0.3348 | 0.1207 | 11 | 2  | 0  | 14 | 296 |
| YKL185W | ASH1  | 0.0427 | 0.3836 | 0.1113 | 20 | 3  | 16 | 3  | 97  |
| YKR034W | DAL80 | 0.0146 | 0.2886 | 0.0506 | 3  | 2  | 35 | 0  | 52  |
| YKR099W | BAS1  | 0.039  | 0.4078 | 0.0956 | 6  | 4  | 12 | 0  | 66  |
| YLR013W | GAT3  | #      | #      | #      | 0  | 4  | 27 | 0  | 75  |
| YLR014C | PPR1  | 0.0577 | 0.4086 | 0.1412 | 3  | 1  | 1  | 0  | 24  |
| YLR098C | CHA4  | 0.0186 | 0.2891 | 0.0643 | 7  | 1  | 6  | 3  | 59  |



|         |       |        |        |        |    |     |    |    |     |
|---------|-------|--------|--------|--------|----|-----|----|----|-----|
| YLR131C | ACE2  | 0.058  | 0.3171 | 0.1829 | 20 | 5   | 21 | 4  | 112 |
| YLR176C | RFX1  | 0.0459 | 0.3406 | 0.1348 | 17 | 1   | 0  | 1  | 50  |
| YLR182W | SWI6  | 0.0419 | 0.3412 | 0.1228 | 22 | 0   | 14 | 5  | 87  |
| YLR223C | IFH1  | 0.0467 | 0.4469 | 0.1045 | 13 | 1   | 0  | 0  | 2   |
| YLR228C | ECM22 | 0.0267 | 0.4517 | 0.0591 | 3  | 4   | 14 | 1  | 139 |
| YLR256W | HAP1  | 0.0211 | 0.4025 | 0.0524 | 7  | 3   | 26 | 9  | 150 |
| YLR266C | PDR8  | 0.0715 | 0.3035 | 0.2356 | 1  | 6 # | #  | #  |     |
| YLR375W | STP3  | 0.0155 | 0.2974 | 0.0521 | 5  | 5 # | #  | #  |     |
| YLR403W | SFP1  | 0.0357 | 0.3444 | 0.1037 | 9  | 2   | 8  | 4  | 96  |
| YLR451W | LEU3  | 0.0272 | 0.3473 | 0.0783 | 7  | 3   | 18 | 1  | 43  |
| YML007W | YAP1  | #      | #      | #      | 52 | 8   | 30 | 7  | 130 |
| YML027W | YOX1  | 0.0343 | 0.2793 | 0.1228 | 3  | 3   | 13 | 7  | 342 |
| YML051W | GAL80 | 0.0122 | 0.3453 | 0.0353 | 8  | 1   | 1  | 0  | 4   |
| YML076C | WAR1  | 0.0484 | 0.3764 | 0.1286 | 1  | 3   | 1  | 0  | 13  |
| YML099C | ARG81 | 0.0346 | 0.3953 | 0.0875 | 6  | 3   | 14 | 2  | 41  |
| YMR016C | SOK2  | 0.0665 | 0.3858 | 0.1724 | 5  | 9   | 28 | 44 | 797 |
| YMR021C | MAC1  | 0.0441 | 0.3692 | 0.1194 | 2  | 0   | 7  | 3  | 57  |
| YMR037C | MSN2  | 0.0495 | 0.3728 | 0.1328 | 7  | 9   | 24 | 4  | 168 |
| YMR042W | ARG80 | 0.0642 | 0.3893 | 0.1649 | 4  | 1   | 12 | 2  | 25  |
| YMR043W | MCM1  | 0.024  | 0.3038 | 0.079  | 17 | 1   | 19 | 6  | 232 |
| YMR070W | MOT3  | 0.0737 | 0.3701 | 0.1991 | 2  | 10  | 27 | 0  | 48  |
| YMR164C | MSS11 | 0.0707 | 0.4178 | 0.1692 | 3  | 4   | 7  | 2  | 63  |
| YMR172W | HOT1  | 0.0732 | 0.4138 | 0.1769 | 6  | 4 # | #  | #  |     |
| YMR182C | RGM1  | 0.0456 | 0.2147 | 0.2124 | 3  | 3   | 23 | 1  | 24  |
| YMR280C | CAT8  | 0.0574 | 0.3673 | 0.1563 | 6  | 4 # | #  | #  |     |
| YNL027W | CRZ1  | 0.0393 | 0.3829 | 0.1026 | 25 | 2   | 4  | 1  | 13  |
| YNL068C | FKH2  | 0.0295 | 0.3789 | 0.0779 | 12 | 1   | 17 | 10 | 233 |
| YNL103W | MET4  | 0.0743 | 0.4526 | 0.1642 | 13 | 5   | 12 | 3  | 51  |
| YNL167C | SKO1  | 0.0488 | 0.3957 | 0.1233 | 11 | 1   | 13 | 5  | 142 |

|         |       |        |        |        |    |     |    |    |     |
|---------|-------|--------|--------|--------|----|-----|----|----|-----|
| YNL199C | GCR2  | 0.0236 | 0.3781 | 0.0624 | 9  | 1   | 17 | 5  | 89  |
| YNL204C | SPS18 | 0.0436 | 0.4566 | 0.0955 | 1  | 1 # | #  | #  |     |
| YNL216W | RAP1  | 0.0333 | 0.3573 | 0.0932 | 12 | 2   | 20 | 21 | 326 |
| YNL255C | GIS2  | 0.0055 | 0.2662 | 0.0207 | 5  | 1 # | #  | #  |     |
| YNL314W | DAL82 | 0.0386 | 0.3132 | 0.1232 | 6  | 0   | 7  | 7  | 139 |
| YOL028C | YAP7  | #      | #      | #      | 2  | 3   | 16 | 4  | 180 |
| YOL067C | RTG1  | 0.0079 | 0.4632 | 0.0171 | 3  | 1   | 23 | 2  | 52  |
| YOL089C | HAL9  | 0.0493 | 0.4137 | 0.1192 | 0  | 1   | 18 | 1  | 37  |
| YOL108C | INO4  | 0.0625 | 0.5504 | 0.1136 | 25 | 3   | 8  | 20 | 564 |
| YOL116W | MSN1  | 0.0264 | 0.3371 | 0.0783 | 0  | 4   | 3  | 0  | 6   |
| YOR028C | CIN5  | 0.053  | 0.5137 | 0.1032 | 8  | 8   | 30 | 18 | 277 |
| YOR032C | HMS1  | 0.0579 | 0.3631 | 0.1595 | 2  | 9   | 31 | 0  | 12  |
| YOR038C | HIR2  | 0.0315 | 0.2885 | 0.1092 | 11 | 4   | 7  | 1  | 10  |
| YOR113W | AZF1  | 0.0581 | 0.3701 | 0.157  | 8  | 0   | 16 | 2  | 24  |
| YOR140W | SFL1  | 0.0479 | 0.276  | 0.1736 | 9  | 13  | 4  | 0  | 2   |
| YOR162C | YRR1  | 0.0628 | 0.2918 | 0.2152 | 10 | 3   | 4  | 0  | 23  |
| YOR172W | YRM1  | 0.061  | 0.4591 | 0.1329 | 2  | 0 # | #  | #  |     |
| YOR344C | TYE7  | 0.0215 | 0.2628 | 0.0818 | 5  | 17  | 15 | 4  | 97  |
| YOR358W | HAP5  | 0.0454 | 0.442  | 0.1027 | 7  | 3   | 25 | 6  | 128 |
| YOR363C | PIP2  | 0.0288 | 0.4176 | 0.069  | 2  | 0   | 4  | 2  | 36  |
| YOR380W | RDR1  | 0.0241 | 0.3215 | 0.075  | 2  | 0   | 0  | 0  | 1   |
| YPL038W | MET31 | 0.0356 | 0.3369 | 0.1057 | 3  | 0   | 14 | 2  | 43  |
| YPL075W | GCR1  | 0.0334 | 0.379  | 0.0881 | 7  | 2   | 3  | 0  | 24  |
| YPL089C | RLM1  | 0.0556 | 0.4464 | 0.1246 | 7  | 0   | 34 | 0  | 69  |
| YPL133C | RDS2  | 0.0555 | 0.4546 | 0.1221 | 14 | 1 # | #  | #  |     |
| YPL139C | UME1  | 0.0635 | 0.4431 | 0.1433 | 22 | 4 # | #  | #  |     |
| YPL177C | CUP9  | 0.0547 | 0.3265 | 0.1675 | 5  | 9   | 29 | 1  | 21  |
| YPL202C | AFT2  | 0.0733 | 0.5038 | 0.1455 | 0  | 4   | 23 | 3  | 166 |
| YPL248C | GAL4  | 0.0845 | 0.3989 | 0.2118 | 37 | 1   | 21 | 6  | 100 |

|         |         |        |        |        |    |    |    |   |     |
|---------|---------|--------|--------|--------|----|----|----|---|-----|
| YPL270W | MDL2    | 0.0244 | 0.4563 | 0.0535 | 2  | 5  | 1  | 1 | 1   |
| YPR008W | HAA1    | 0.0332 | 0.3134 | 0.1059 | 6  | 0  | #  | # | #   |
| YPR015C | YPR015c | #      | #      | #      | 6  | 7  | #  | # | #   |
| YPR065W | ROX1    | 0.0341 | 0.4459 | 0.0765 | 1  | 12 | 54 | 7 | 135 |
| YPR094W | RDS3    | #      | #      | #      | 6  | 2  | #  | # | #   |
| YPR104C | FHL1    | 0.0588 | 0.4816 | 0.1221 | 10 | 3  | 4  | 5 | 234 |
| YPR199C | ARR1    | 0.012  | 0.0447 | 0.2685 | 0  | 0  | 19 | 0 | 23  |

# in the table means that the TF is absent in the dataset.
